# Supplementary material for: Genomic Analysis of Localized High-Risk Prostate Cancer Circulating Tumor Cells at the Single-Cell Level
Source: MDPI journal article supplement (doi:10.3390/cells9081863), 2020-08-08
Supplement: s1 [file s1]

**Supplementary Figures 2:** Venn diagram representing CTC-shared SNVs/indels and CNA per patient. Genes highlight in the CNA section were also found in Friedlander *et al.* 2019 and genes highlight in the SNVs/indels were associated with prostate cancer in bold and telomere maintenance in italic. We also emphasize in red CTC-shared genes.

## Copy Number Alterations (CNA)

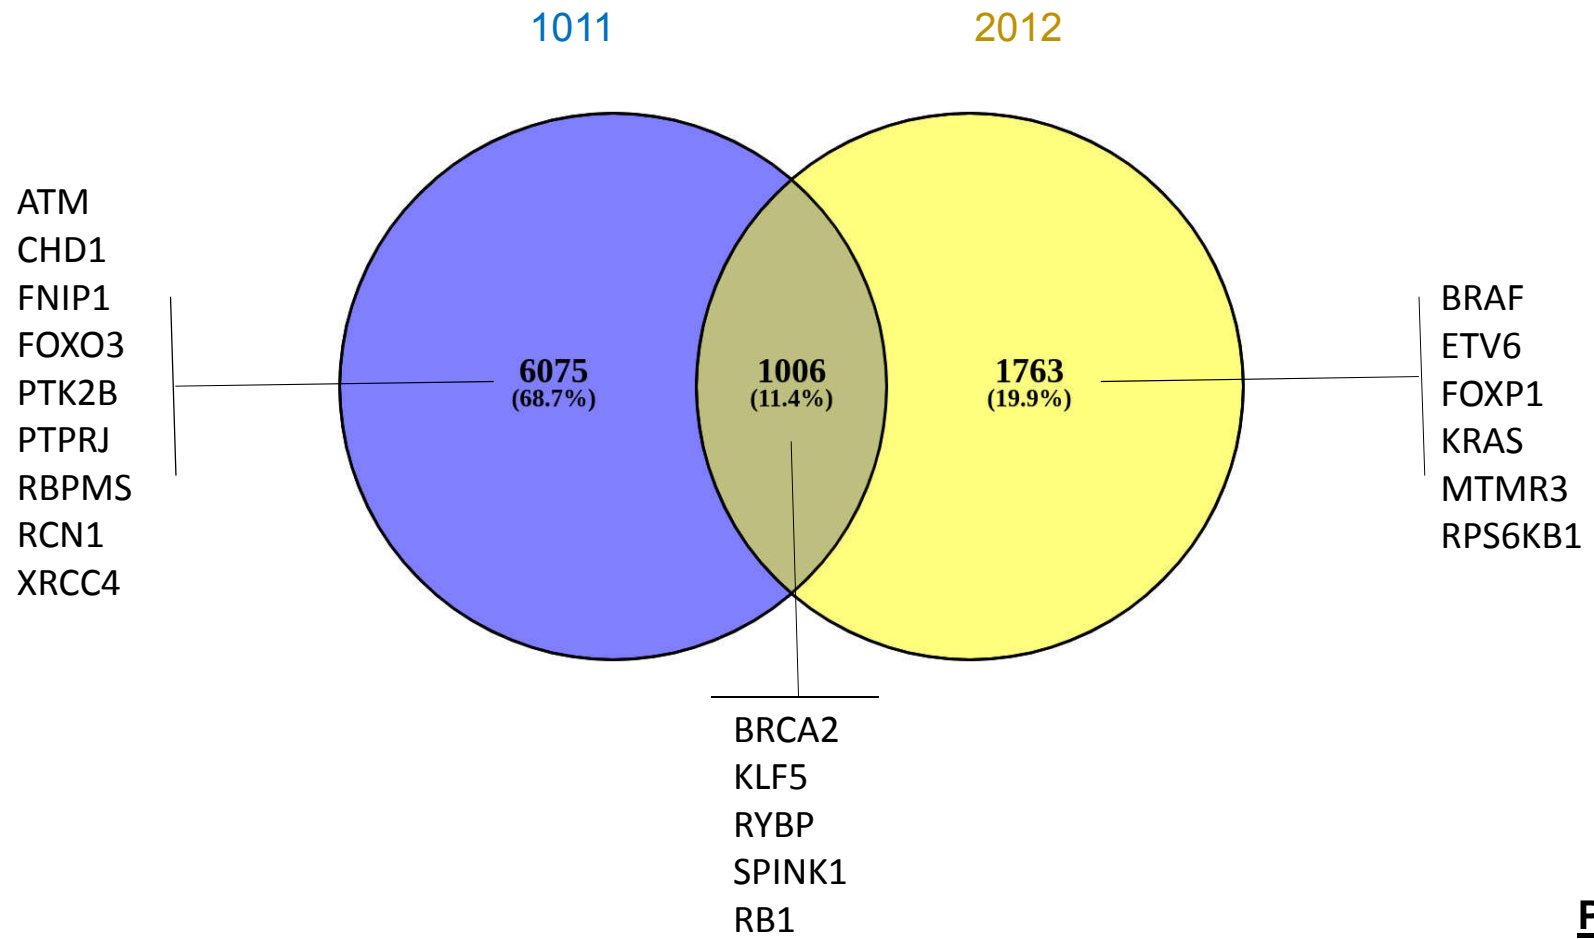

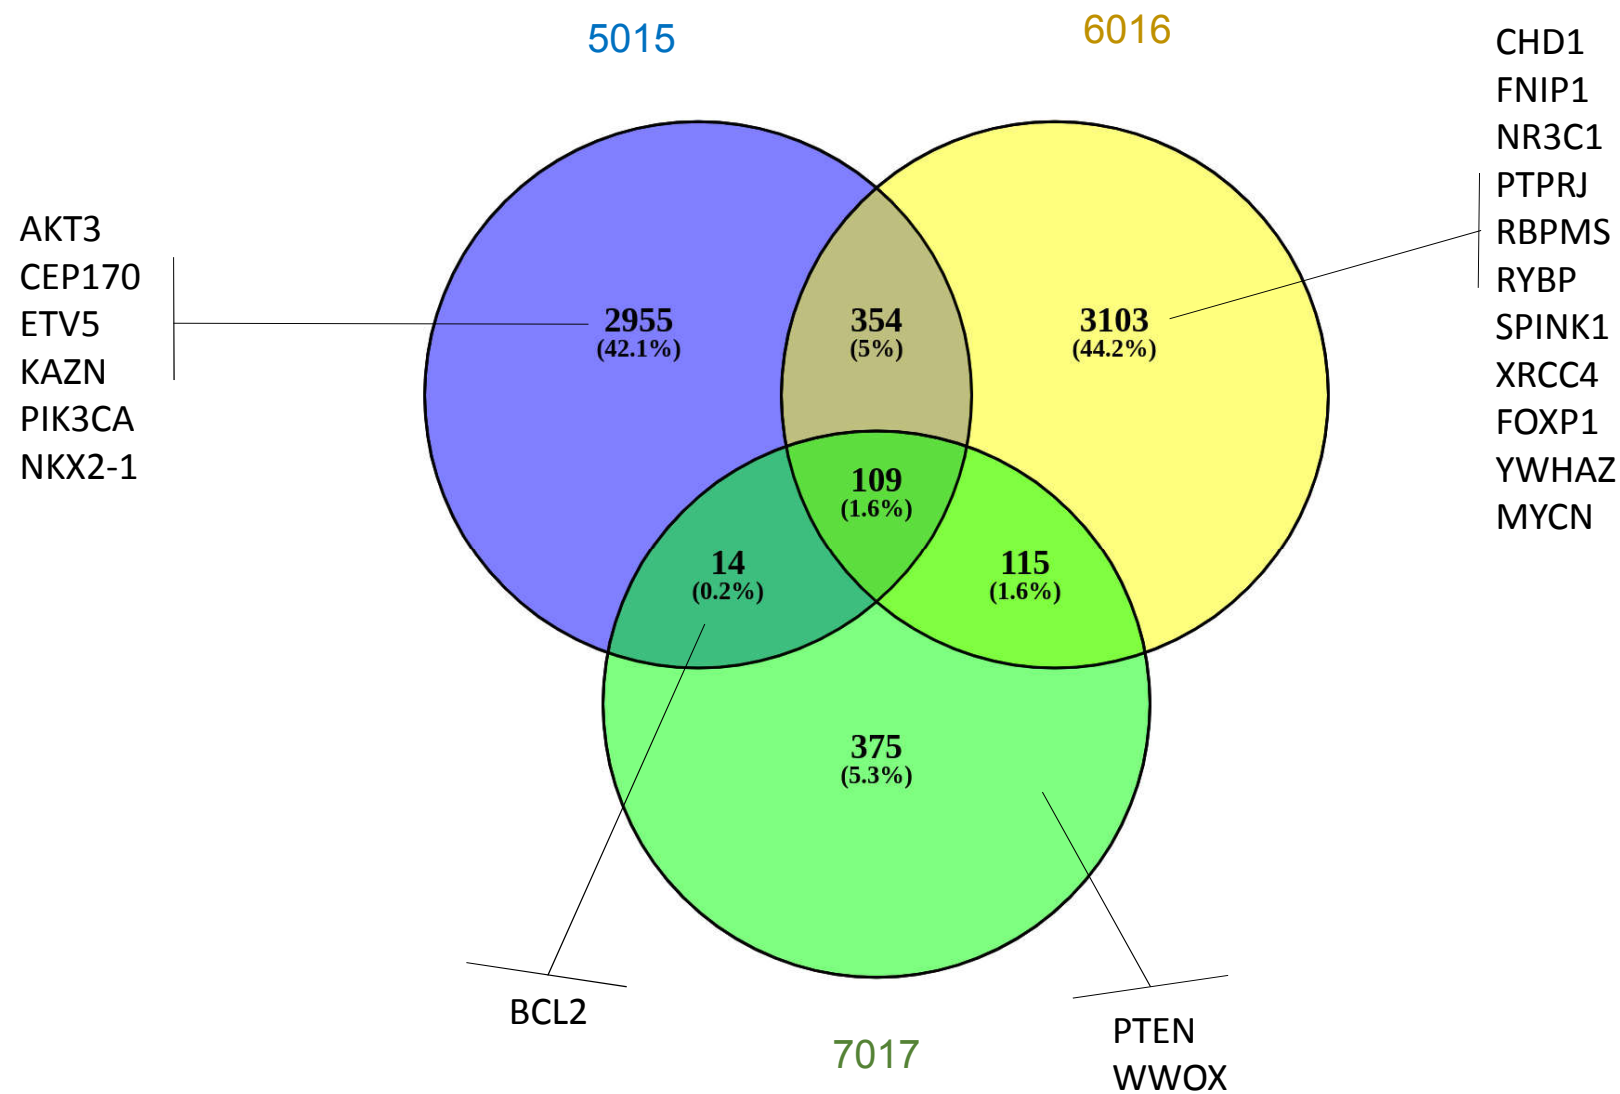

**Patient 3**

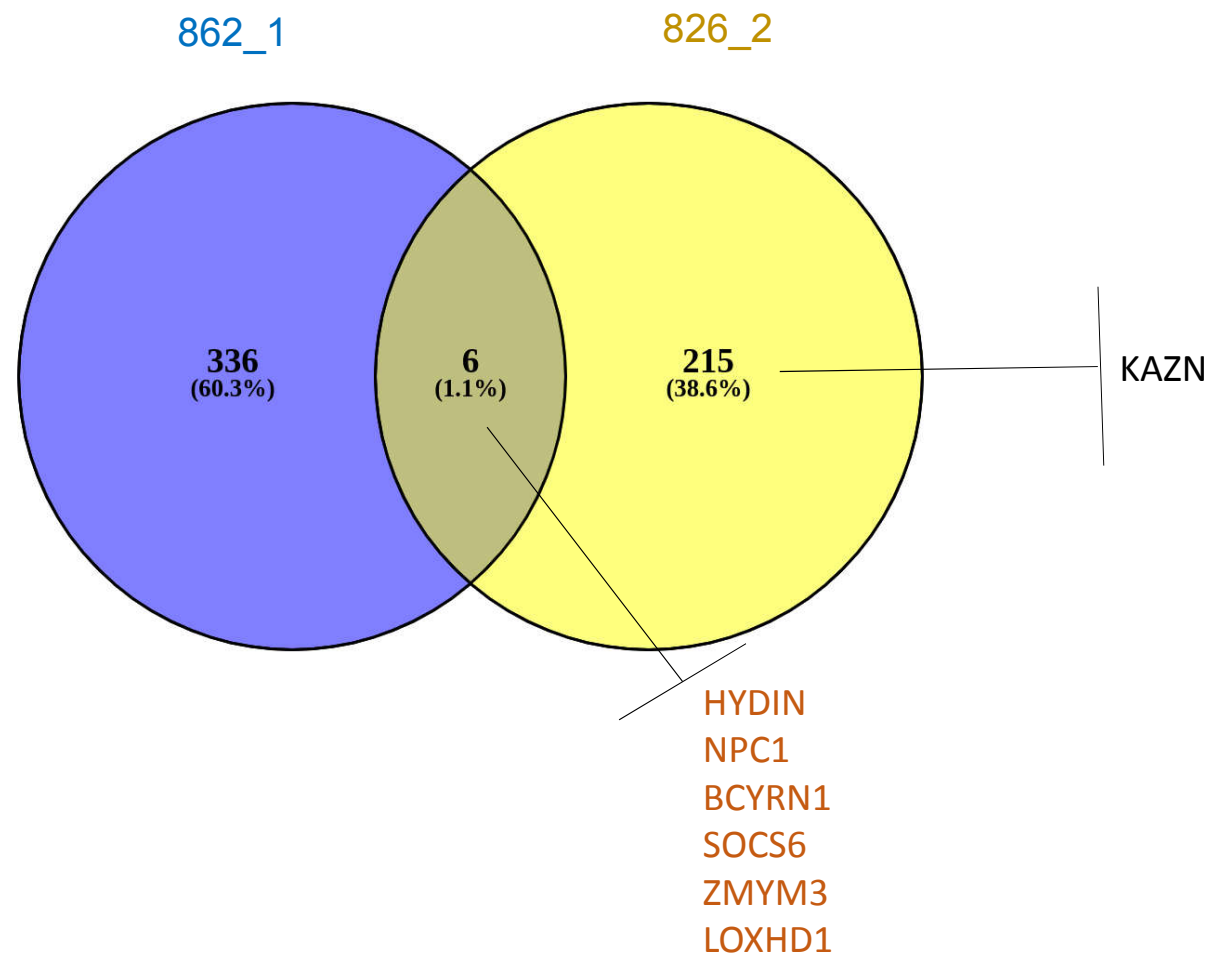

**Patient 5**

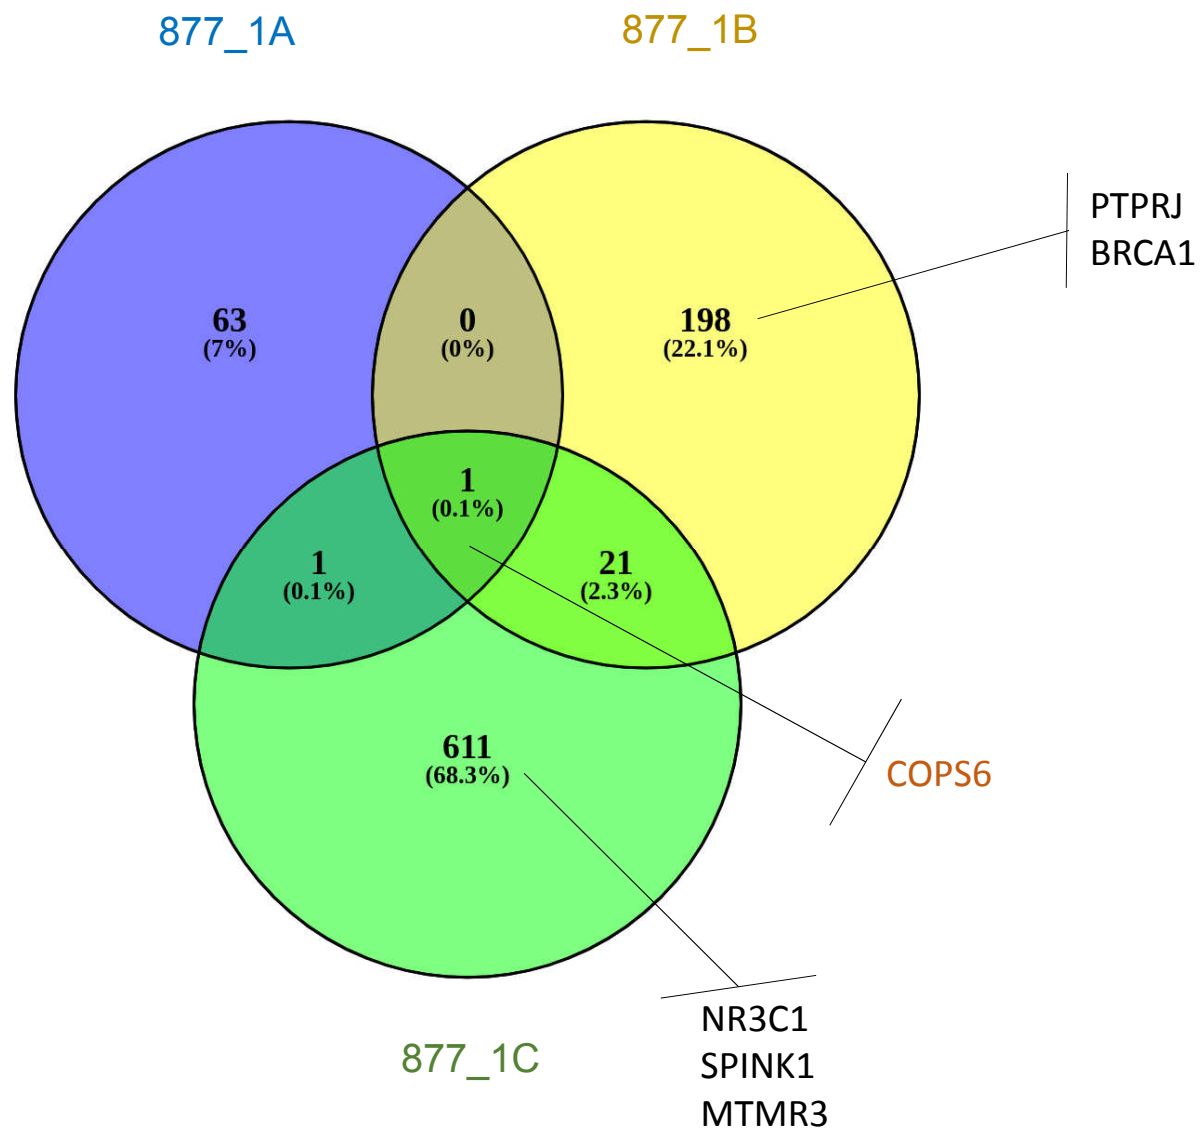

**Patient 6**

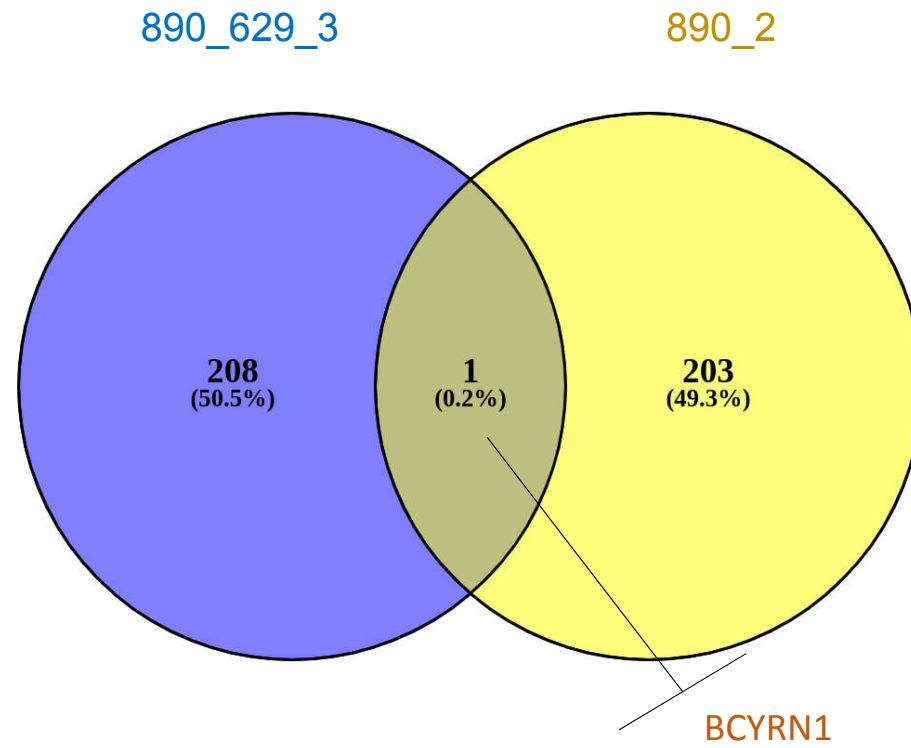

**Patient 7**

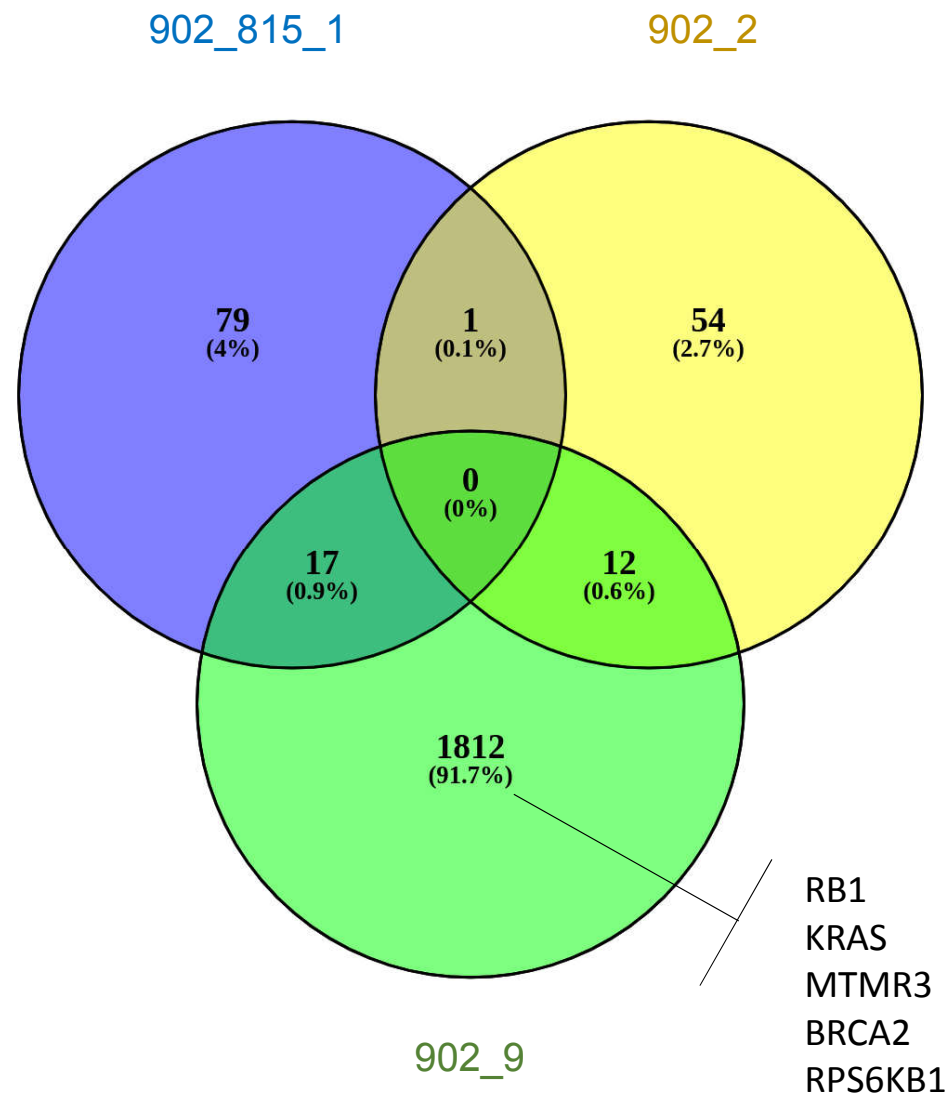

**Patient 8**

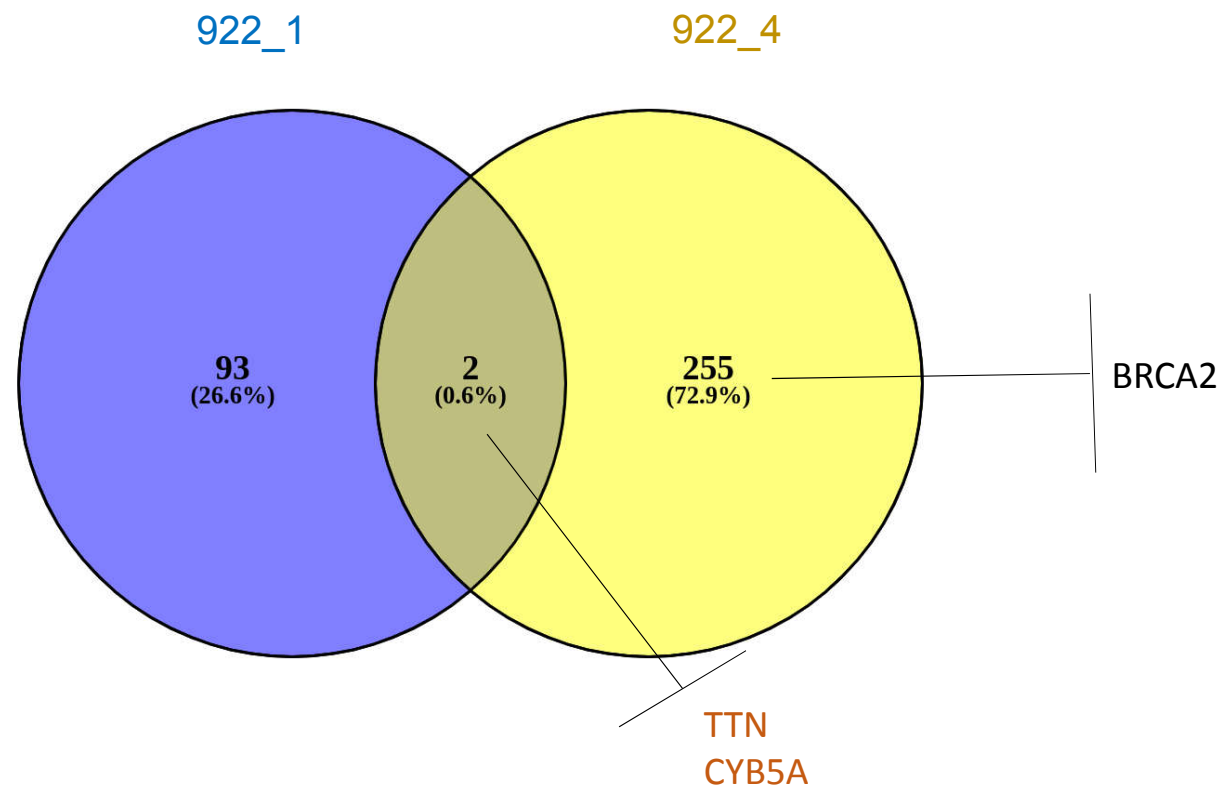

**Patient 9**

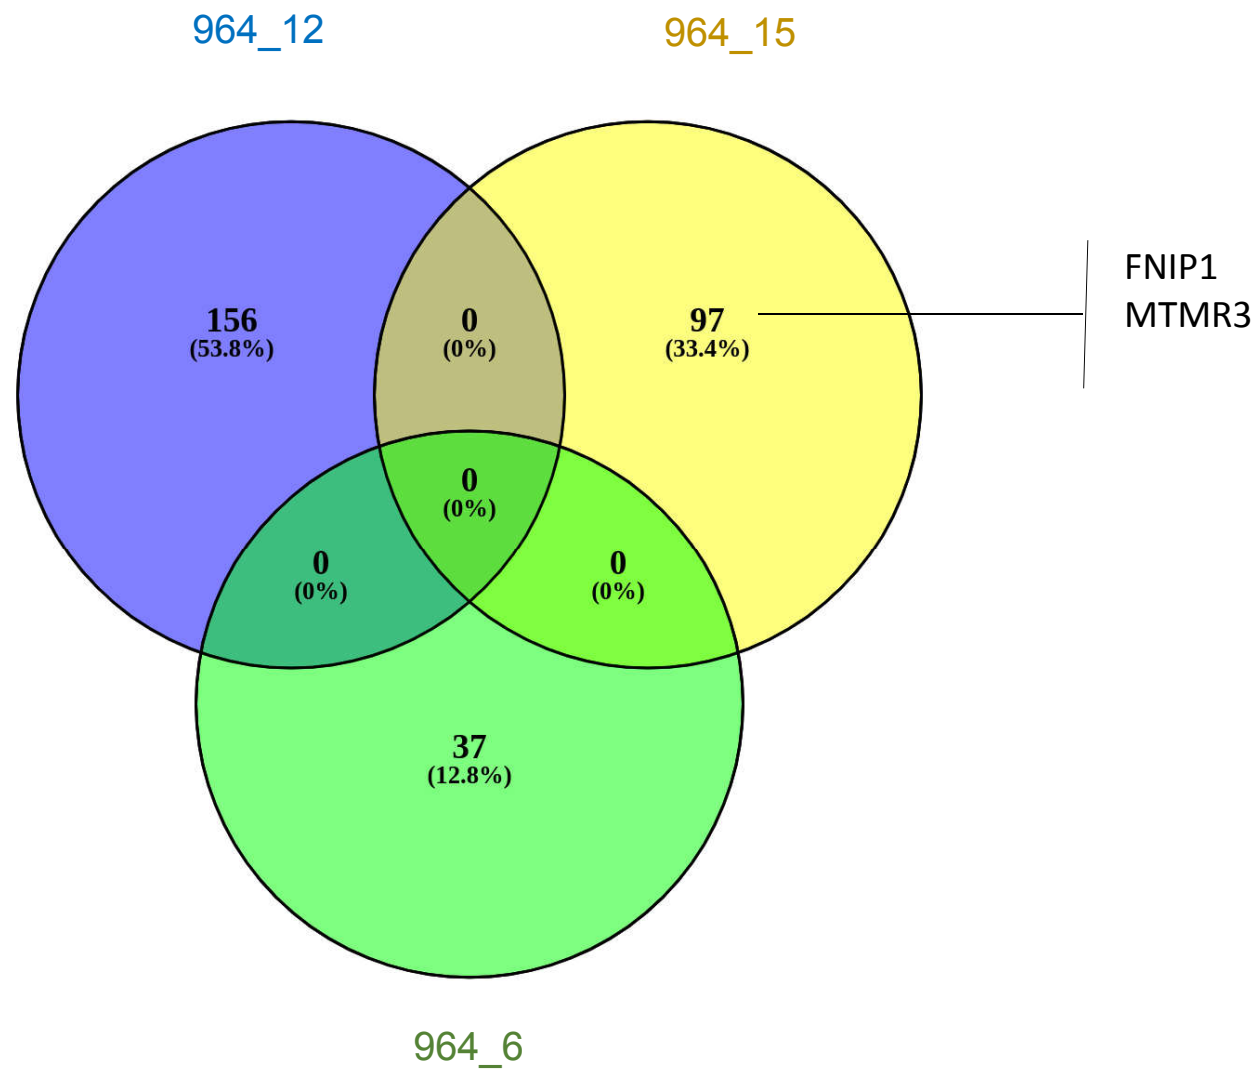

**Patient 10**

Genetic variations (SNP + INDELs)

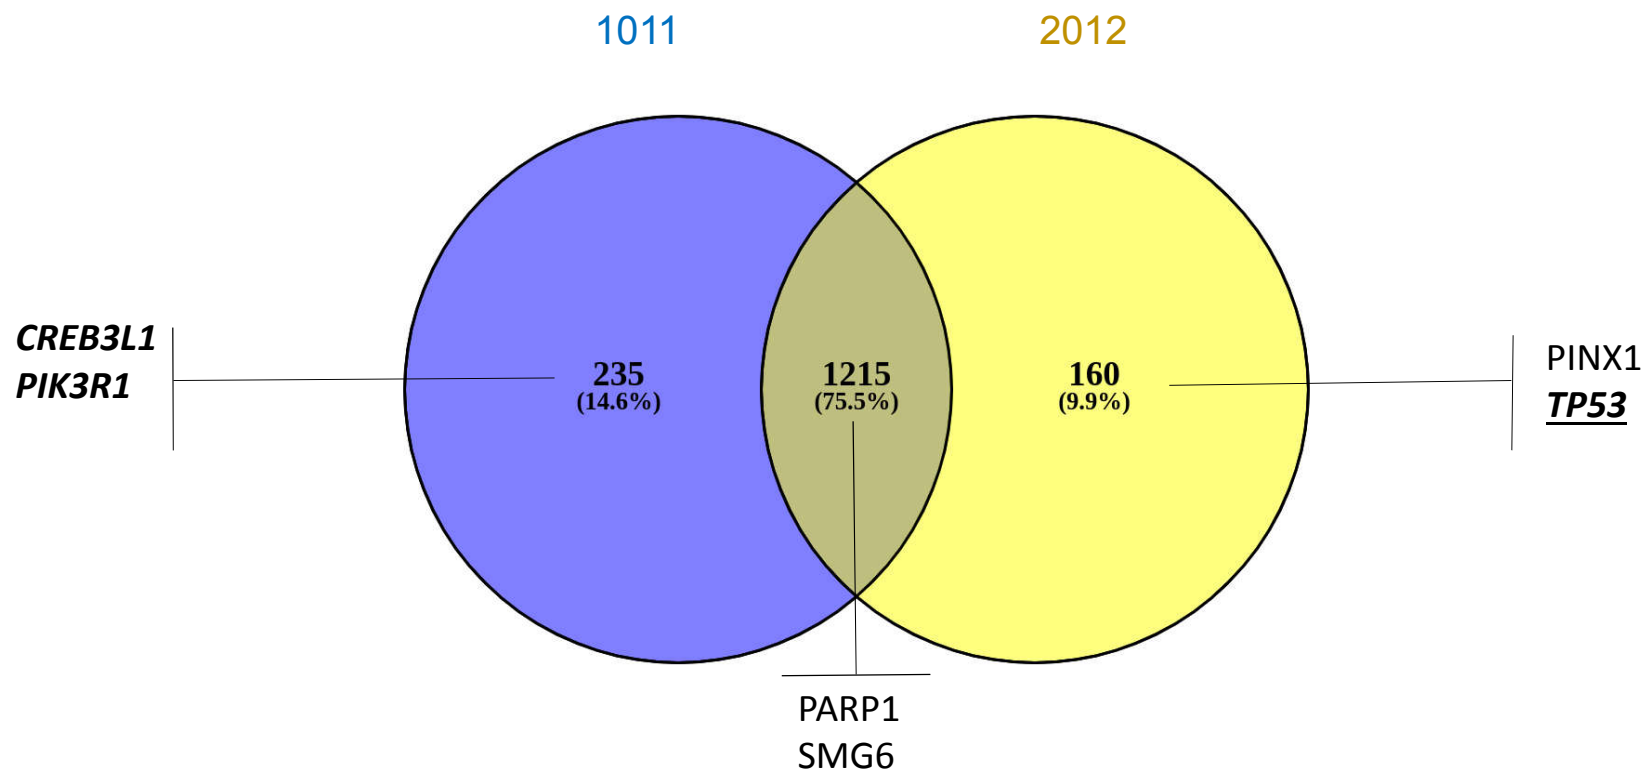

**Patient 1**

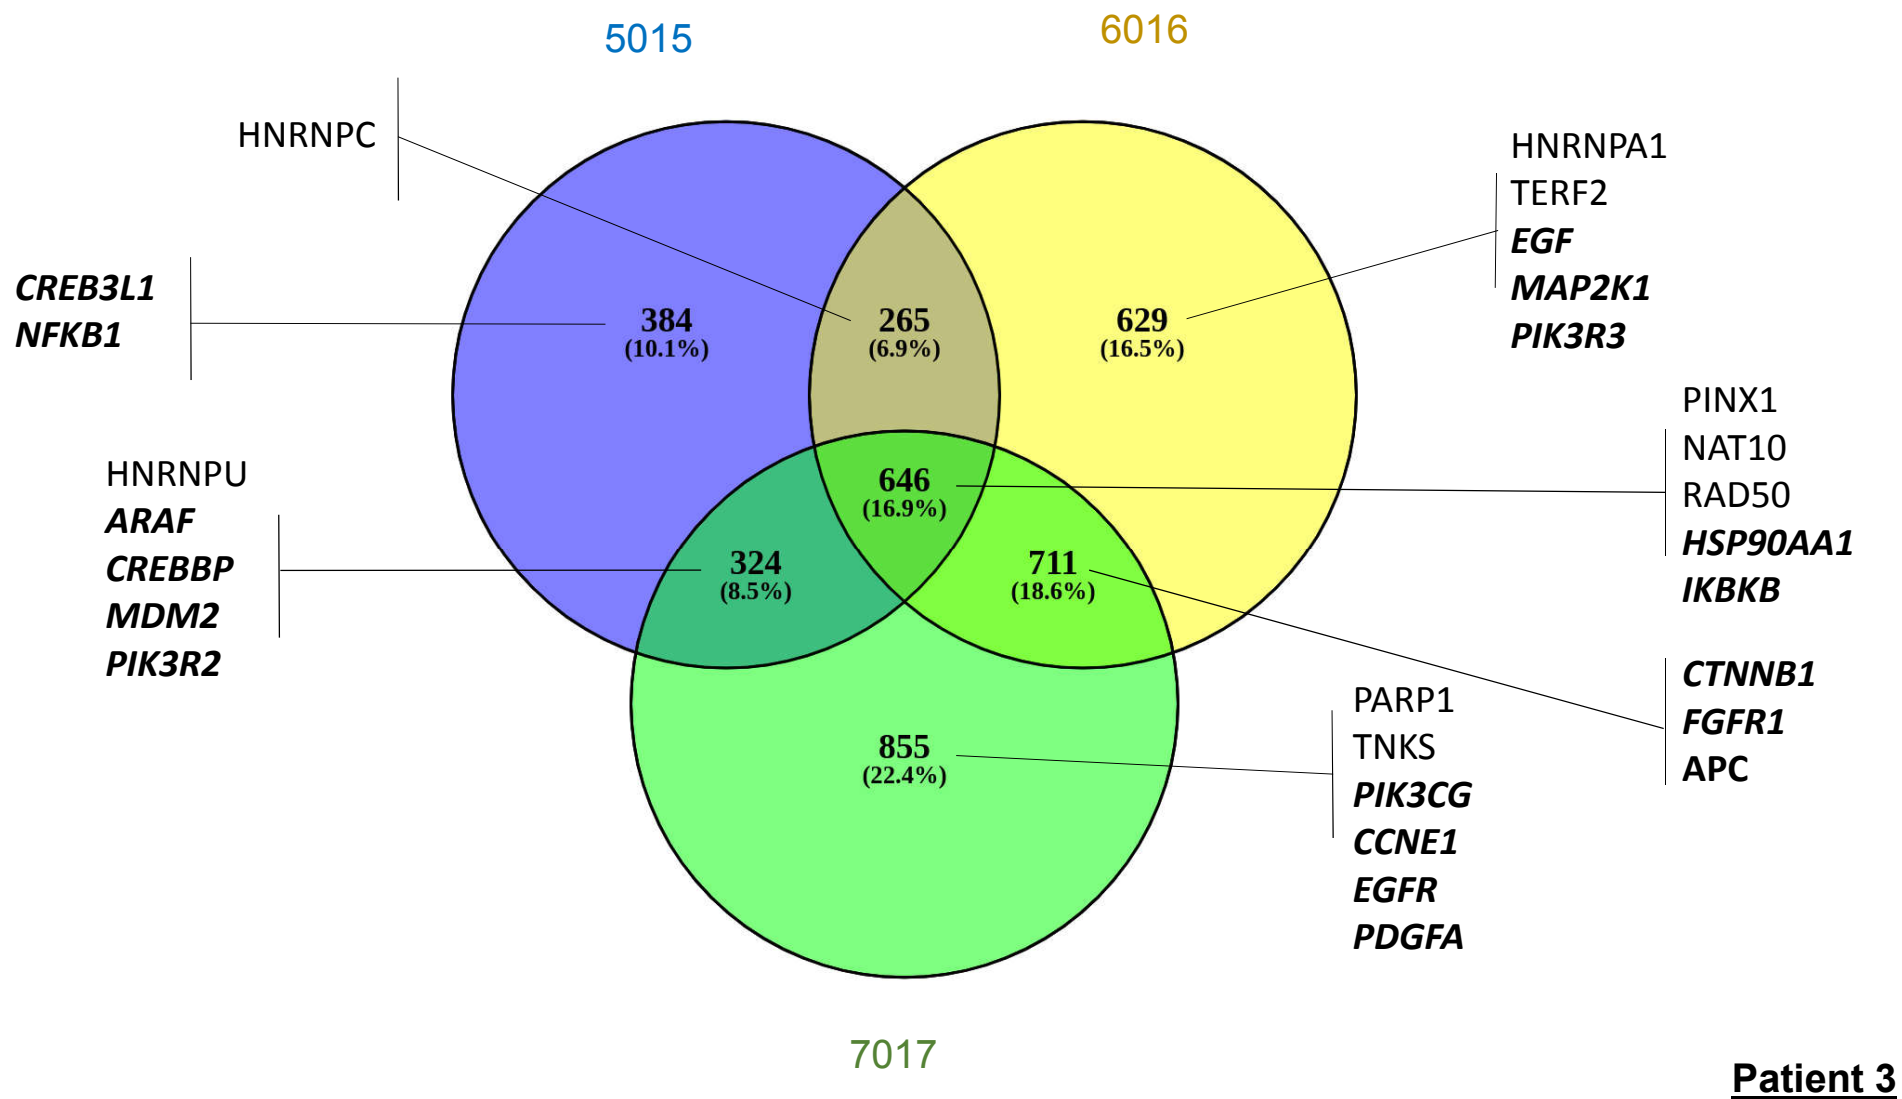

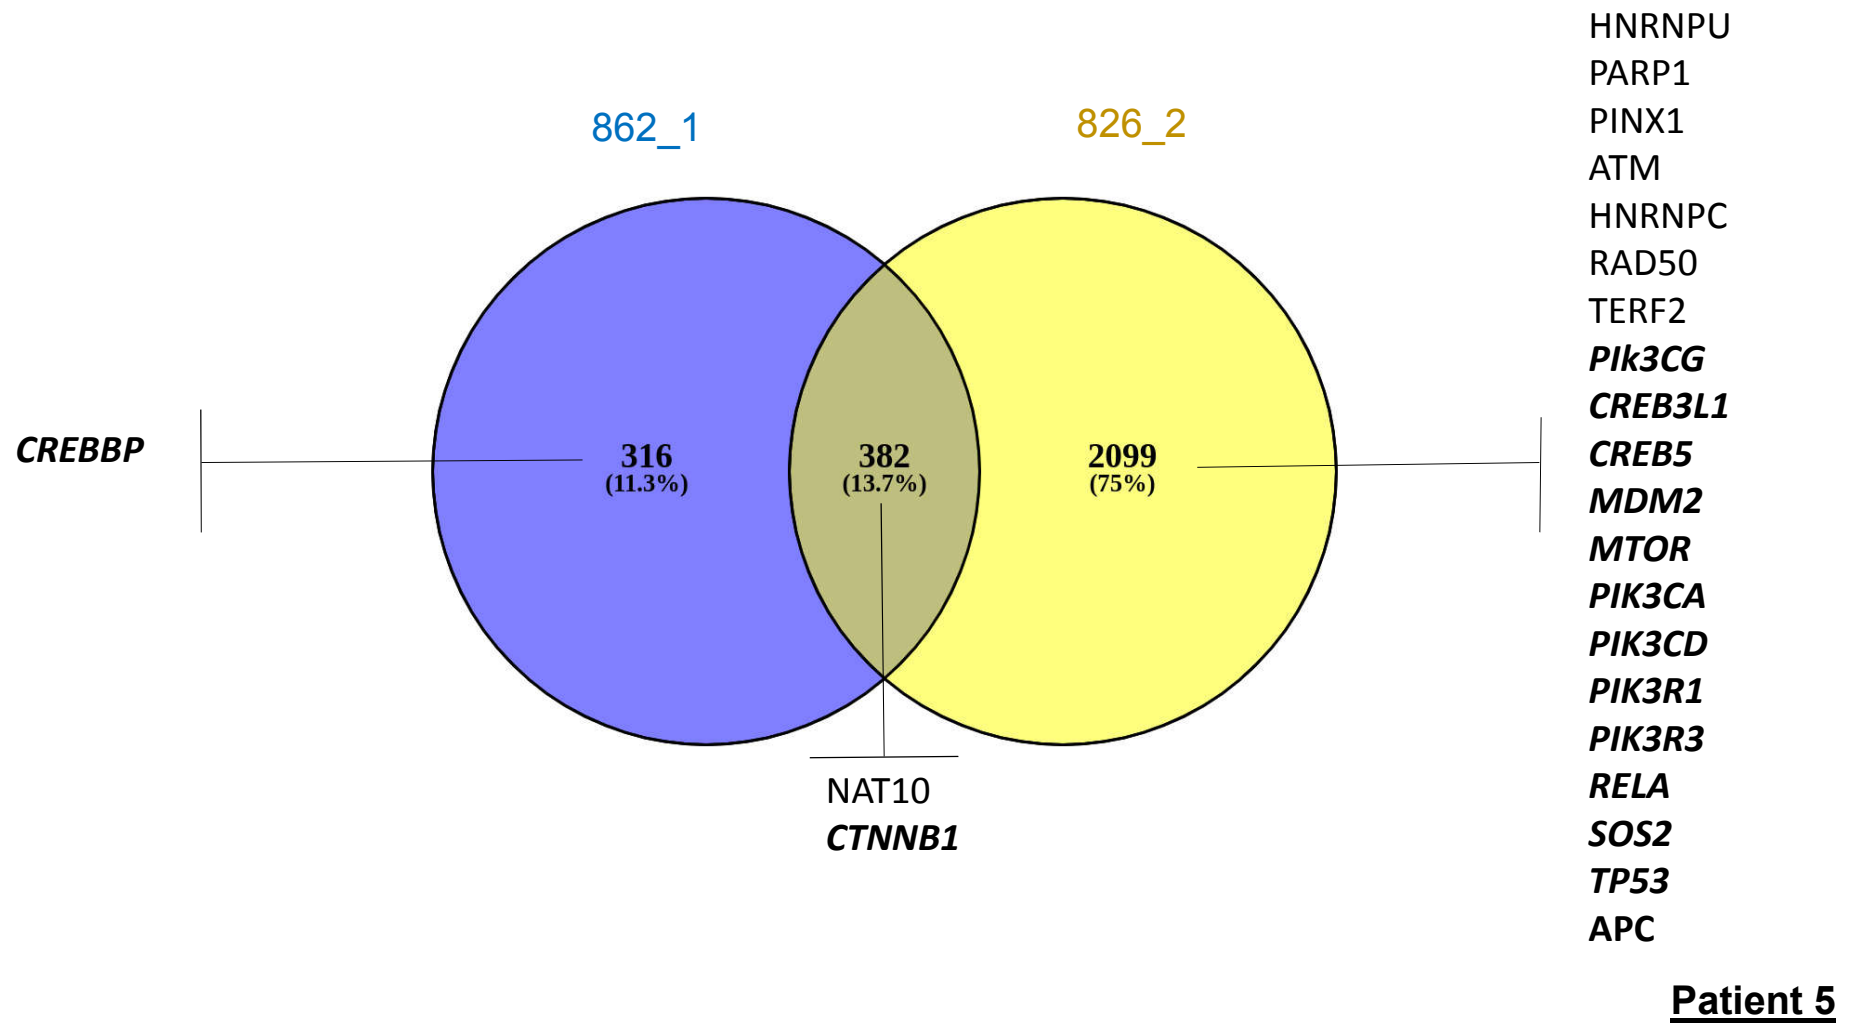

PINX1  
NAT10  
TERF2  
**PIK3CG**  
**TP53**  
**CREB3L1**  
**CREB3L2**  
**CREBBP**  
**CTNNB1**  
**FGFR1**  
**HSP90A**  
**A1**  
**IKBKB**  
**NFKB1**  
**PDGFA**  
**PIK3R3**  
**SOS1**  
**SOS2**  
**APC**

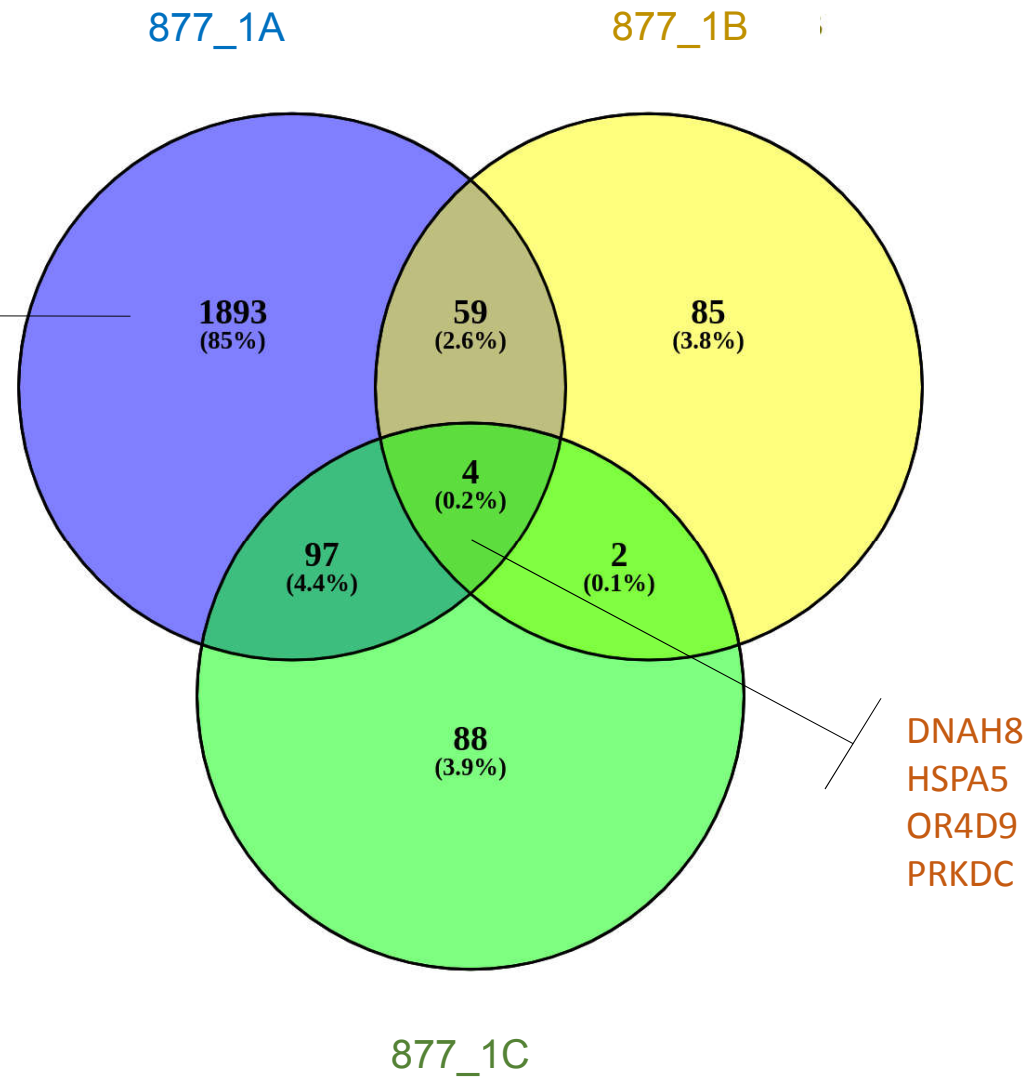

**Patient 6**

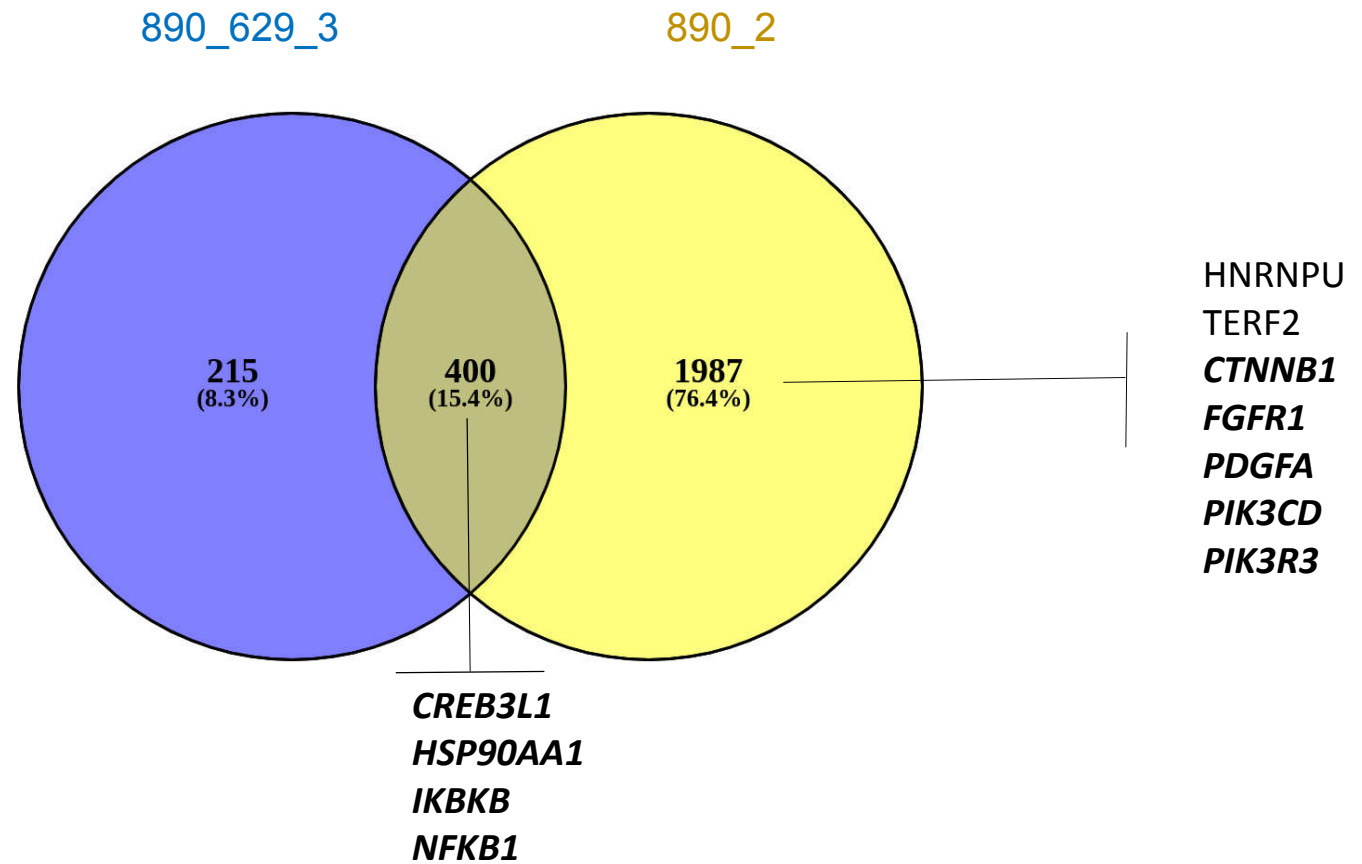

**Patient 7**

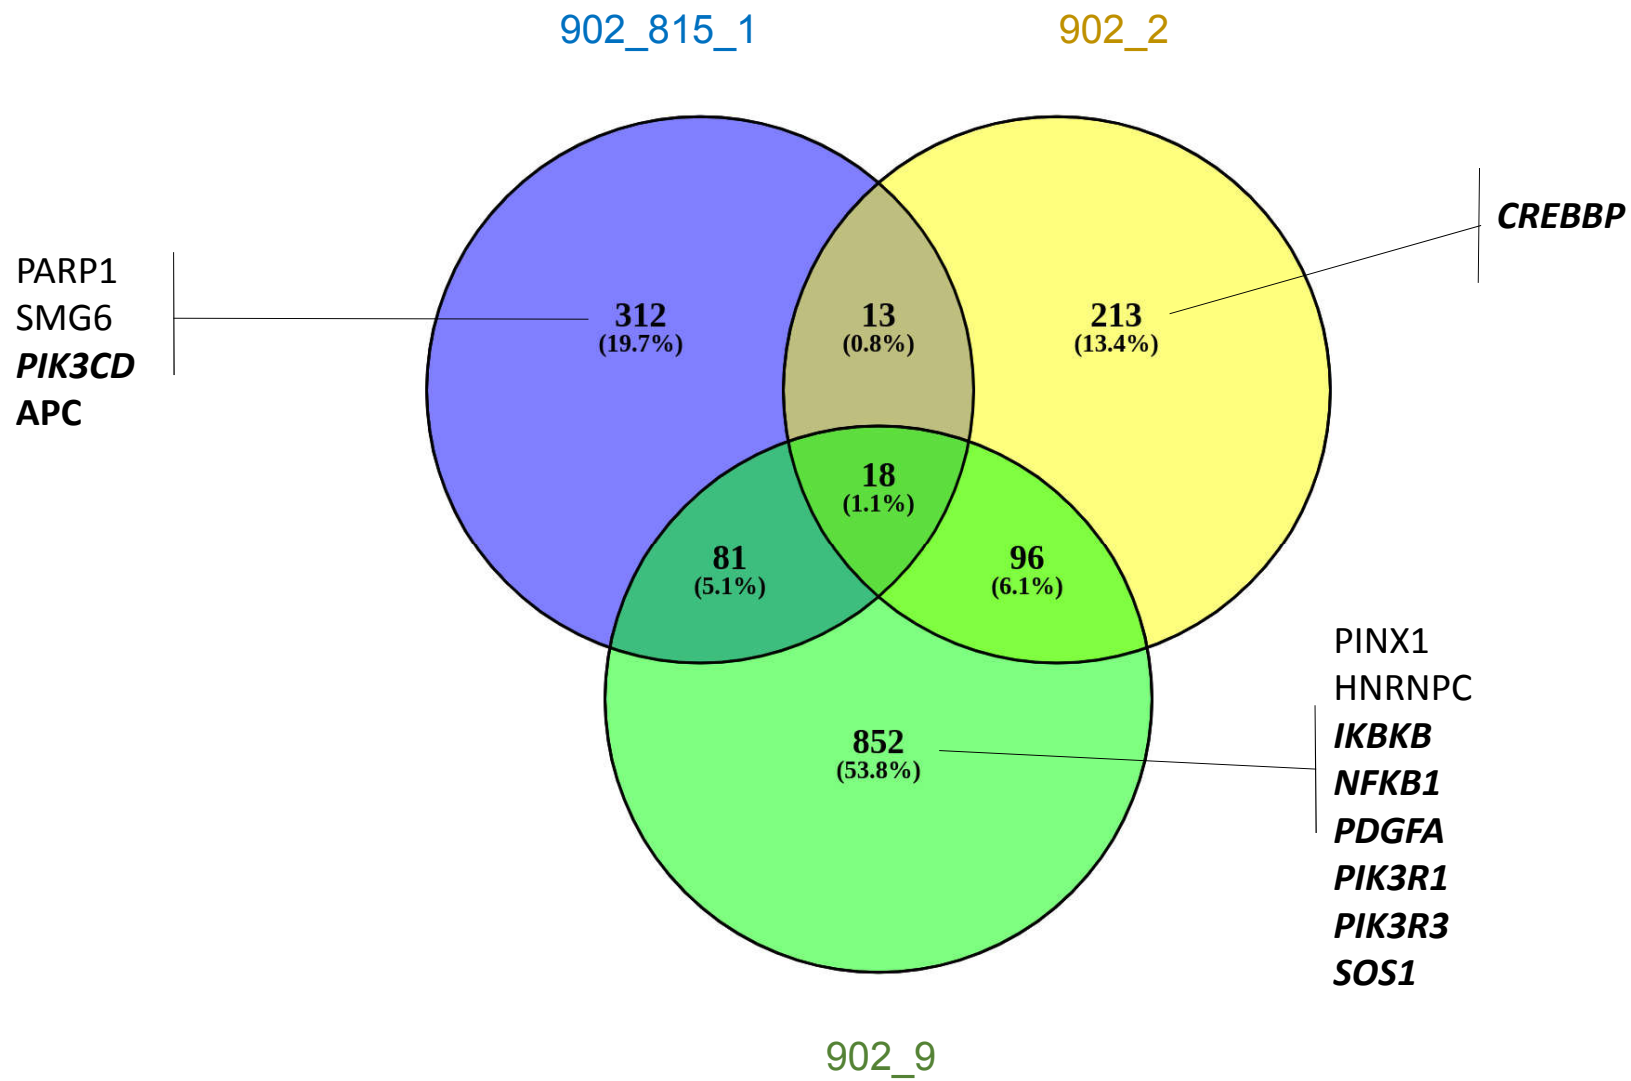

**Patient 8**

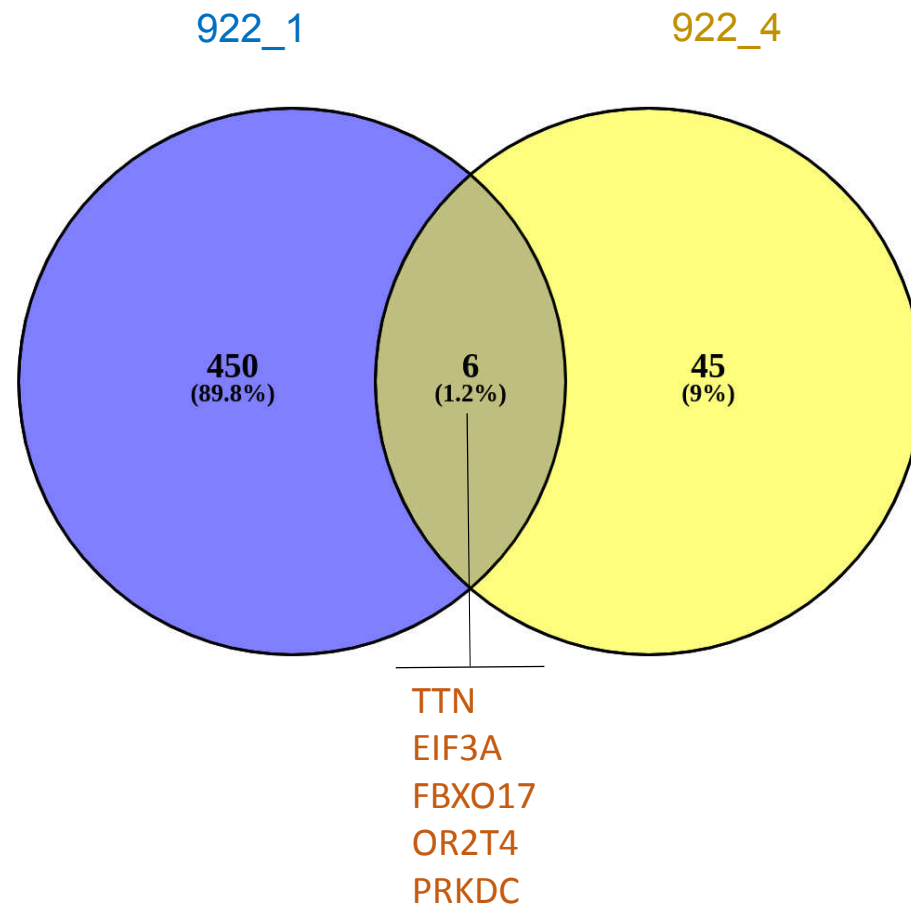

**Patient 9**

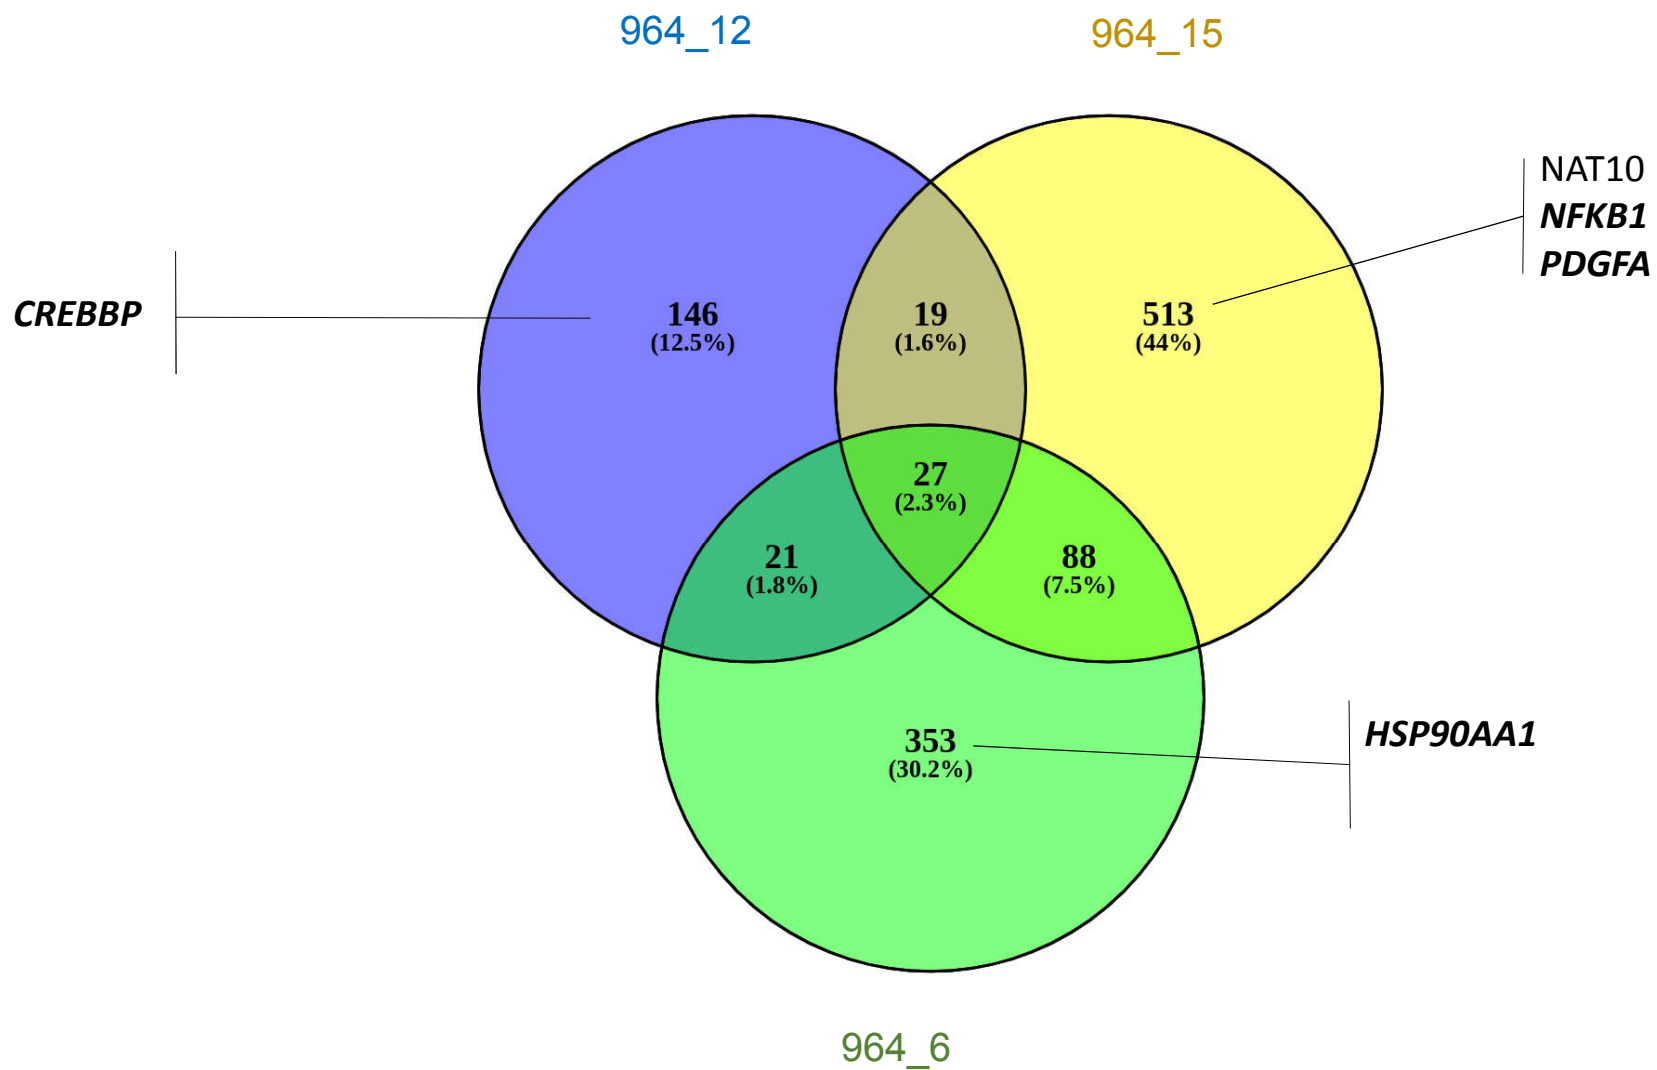

**Patient 10**
